# Supplementary material for: Metalization of Li2S particle surfaces in Li–S batteries
Source: Royal Society of Chemistry journal article supplement (doi:10.1039/c4nr03428g), 2014-09-11
Supplement: c4nr03428g1.pdf [file c4nr03428g1.pdf]

## Metalization of $\text{Li}_2\text{S}$ Nanoparticles in Li-S batteries

Yanxin Chen and Payam Kaghazchi\*

*Institut für Chemie und Biochemie, Freie Universität Berlin, Takustr. 3, 14195 Berlin, Germany*

(Dated: August 15, 2014)

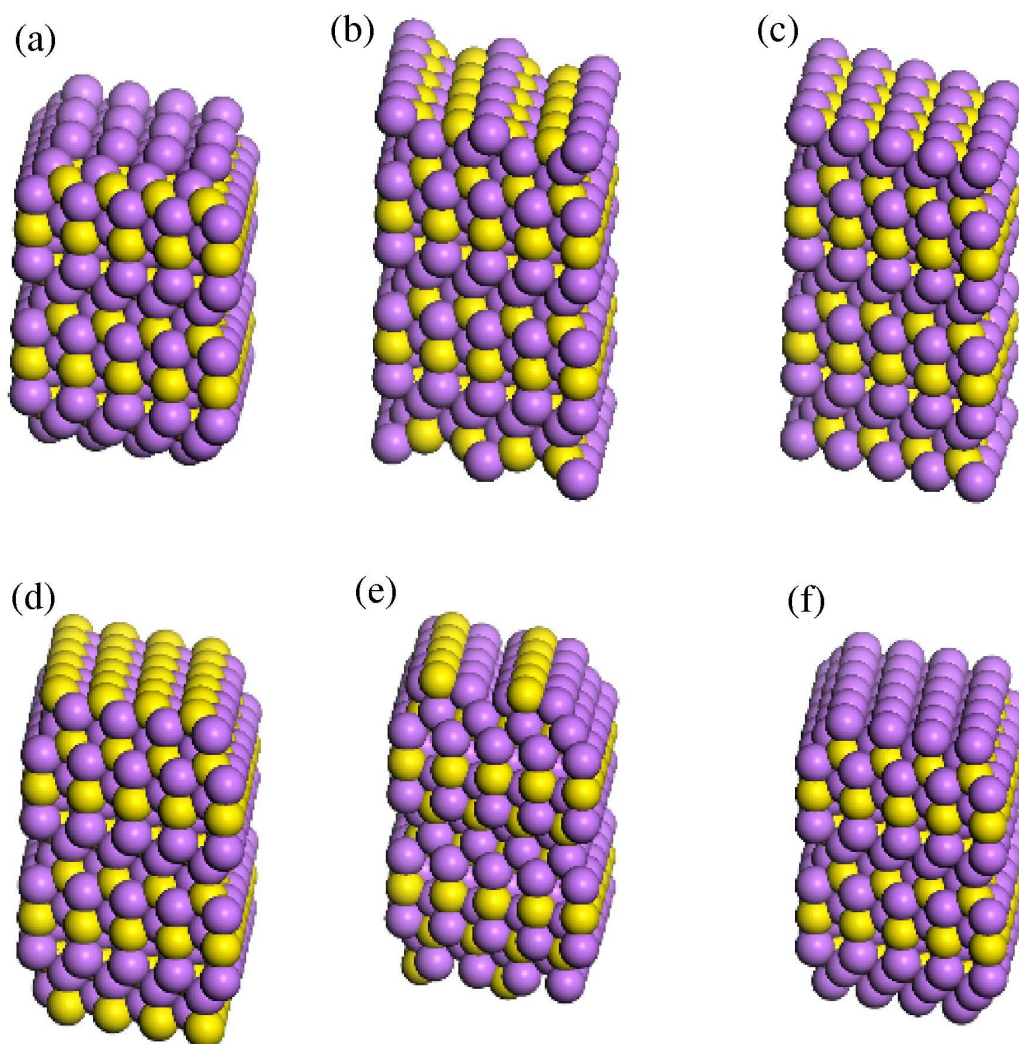

FIG. 1: Atomic structures of (c,d) unreconstructed stoichiometric and (a,b,e,f) non-stoichiometric  $\text{Li}_2\text{S}(111)$  surfaces that have been considered to plot the Figure 4 of the manuscript.

---

\* payam.kaghazchi@fu-berlin.de

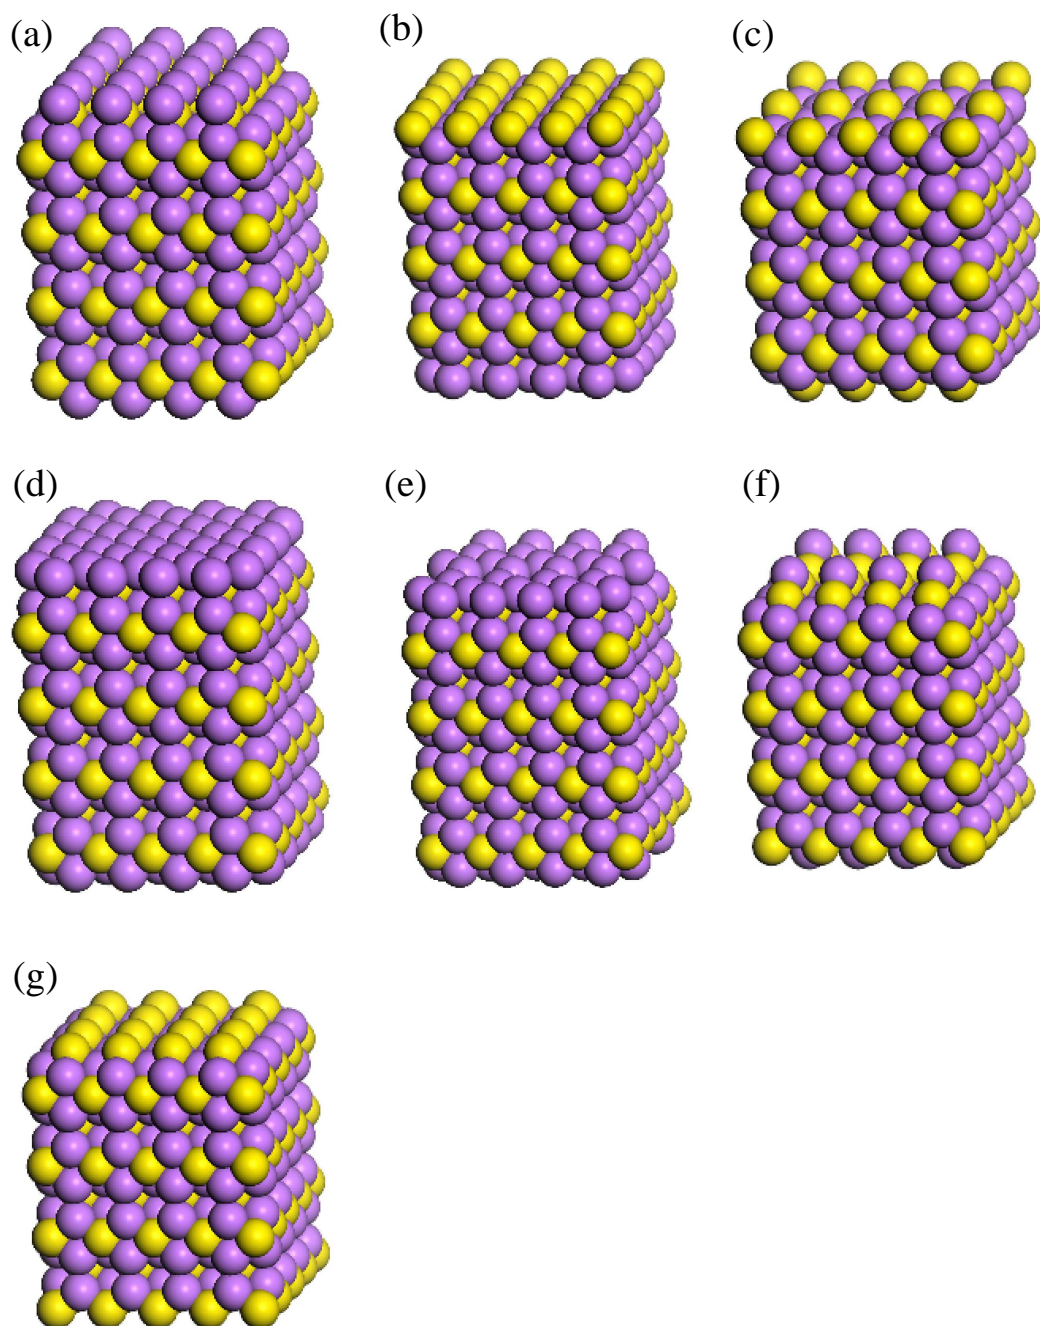

FIG. 2: Atomic structures of the (a,c) reconstructed and (b) unreconstructed stoichiometric as well as (d-g) non-stoichiometric  $\text{Li}_2\text{S}(100)$  surfaces that have been considered to plot the Figure 4 of the manuscript.

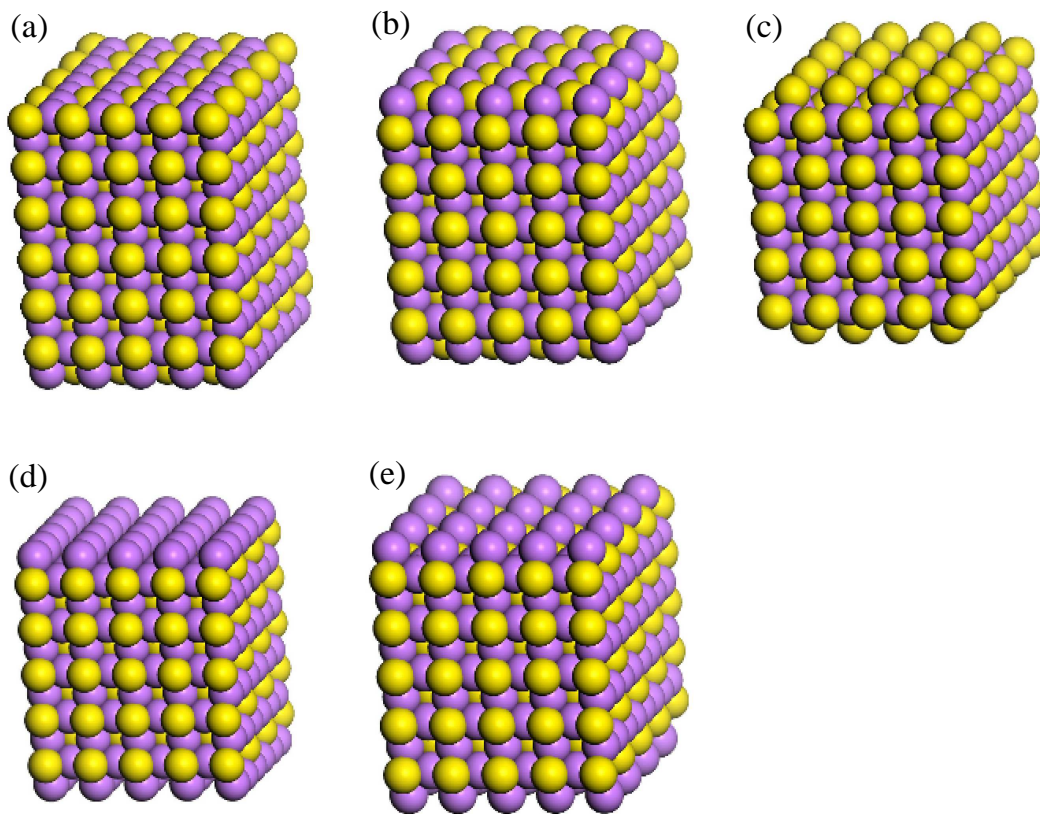

FIG. 3: Atomic structures of (a) unreconstructed stoichiometric and (b–e) non-stoichiometric  $\text{Li}_2\text{S}(110)$  surfaces that have been considered to plot the Figure 4 of the manuscript.
